# Supplementary material
Source: publisher figshare collection journal article supplement (https://asha.figshare.com/articles/dataset/_/9765107)
Supplement: Supplementary file 1 [file 1]

**Supplemental Material S2.** Average control ( $n = 5$ ) performance on temple assessment of language and (verbal) short term memory tasks.

| <b>Task</b>               | <b><i>M</i></b> | <b><i>SD</i></b> |
|---------------------------|-----------------|------------------|
| <u>Naming</u>             |                 |                  |
| 1-sec UF                  | 0.974           | 0.029            |
| 5-sec UF                  | 0.954           | 0.022            |
| 5-sec F                   | 0.930           | 0.044            |
| <u>Word Repetition</u>    |                 |                  |
| 1-sec UF                  | 0.986           | 0.031            |
| 5-sec UF                  | 0.986           | 0.029            |
| 5-sec F                   | 0.960           | 0.089            |
| <u>Nonword Repetition</u> |                 |                  |
| 1 sec UF                  | 0.933           | 0.067            |
| 5-sec UF                  | 0.880           | 0.098            |
| 5-sec F                   | 0.733           | 0.094            |
| <u>Category Judgment</u>  |                 |                  |
| 1-sec UF                  | 0.990           | 0.022            |
| 5-sec UF                  | 0.980           | 0.027            |
| 5-sec F                   | 0.960           | 0.055            |
| <u>Rhyming Judgment</u>   |                 |                  |
| 1-sec UF                  | 0.990           | 0.022            |
| 5-sec UF                  | 1.0             | 0.0              |
| 5-sec F                   | 0.960           | 0.065            |

*Note.* 1-sec UF = 1-second unfilled; 5-sec UF = 5-second unfilled; 5-sec F = 5-second filled.
