# Supplementary material
Source: publisher figshare collection journal article supplement (https://asha.figshare.com/articles/dataset/_/9765107)
Supplement: Supplementary file 2 [file 1]

**Supplemental Material S3.** Means and standard deviations of reaction time for executive function measures in control participants ( $n = 5$ ).

| <b>Task</b>                   | <b><i>M</i><br/>(ms)</b> | <b><i>SD</i><br/>(ms)</b> |
|-------------------------------|--------------------------|---------------------------|
| <u>Simon Task</u>             |                          |                           |
| Congruent Correct RT          | 671.97                   | 276.66                    |
| Incongruent Correct RT        | 715.90                   | 315.55                    |
| <u>Flanker Task</u>           |                          |                           |
| Congruent Correct RT          | 745.45                   | 467.94                    |
| Incongruent Correct RT        | 853.59                   | 679.81                    |
| <u>Number/Letter Shifting</u> |                          |                           |
| RT in Trials 1 and 2          | 1063.45                  | 241.27                    |
| RT in Trial 3                 | 1704.15                  | 313.65                    |

*Note.* RT = Reaction time; ms = millisecond.
