# Supplementary material
Source: publisher figshare collection journal article supplement (https://asha.figshare.com/articles/dataset/_/9765107)
Supplement: Supplementary file 3 [file 1]

**Supplemental Material S1.** Control demographic data.

| Participant | Age | Education |
|-------------|-----|-----------|
| ML          | 57  | 12        |
| NE          | 38  | 12        |
| NK          | 51  | 13        |
| QP          | 34  | 12        |
| SC          | 68  | 18        |
